**Table S5.** ANOVA table showing the effects of fertilizer, competitive environment, differences between GM and non-GM lines and their interactions on relative phenological stage, plant height and vegetative mass

*Simple model*

| Source of variation         | Vegetative mass (log) |      |       | Plant height (log) |      |       | Phenological stage (log) |      |       |
|-----------------------------|-----------------------|------|-------|--------------------|------|-------|--------------------------|------|-------|
|                             | df                    | %SS  | F pr. | df                 | %SS  | F pr. | df                       | %SS  | F pr. |
| Overall mean                | 1                     | 0.6  | <.001 | 1                  | 0.2  | 0.027 | 1                        | 0.5  | 0.001 |
| Block                       | 3                     | 0.4  | 0.439 | 3                  | 1.0  | 0.045 | 3                        | 0.2  | 0.619 |
| Competitive environment     | 14                    | 9.5  | <.001 | 14                 | 2.1  | 0.217 | 14                       | 2.2  | 0.259 |
| Plot                        | 47                    | 7.2  | 0.013 | 47                 | 5.2  | 0.723 | 47                       | 5.9  | 0.005 |
| Fertilizer                  | 1                     | 0.6  | 0.007 | 1                  | 0.0  | 0.730 | 1                        | 0.3  | 0.021 |
| Comp.env.×Fertilizer        | 14                    | 0.3  | 0.994 | 14                 | 1.2  | 0.823 | 14                       | 1.4  | 0.085 |
| Subplot                     | 44                    | 3.4  | 0.015 | 44                 | 5.8  | <.001 | 44                       | 2.5  | 0.144 |
| Phytometer lines            | 14                    | 13.5 | <.001 | 14                 | 7.7  | <.001 | 14                       | 10.2 | <.001 |
| Comp.env.×Phytometer lines  | 180                   | 5.2  | 0.999 | 180                | 5.5  | 0.999 | 180                      | 4.9  | 0.999 |
| Plot×Phytometer lines       | 515                   | 35.9 | <.001 | 610                | 33.3 | 0.025 | 610                      | 32.4 | 0.040 |
| Phytometer lines×Fertilizer | 14                    | 3.3  | <.001 | 14                 | 3.5  | <.001 | 14                       | 5.6  | <.001 |
| Residual                    | 403                   | 20.1 |       | 735                | 34.5 |       | 731                      | 33.9 |       |
| Total                       | 1250                  | 100  |       | 1677               | 100  |       | 1673                     | 100  |       |

*Extended model*

| Source of variation                                        | Vegetative mass (log) |      |       | Plant height (log) |      |       | Phenological stage (log) |      |       |
|------------------------------------------------------------|-----------------------|------|-------|--------------------|------|-------|--------------------------|------|-------|
|                                                            | df                    | %SS  | F pr. | df                 | %SS  | F pr. | df                       | %SS  | F pr. |
| Overall mean                                               | 1                     | 0.6  | <.001 | 1                  | 0.2  | 0.027 | 1                        | 0.5  | 0.001 |
| Block                                                      | 3                     | 0.4  | 0.439 | 3                  | 1.0  | 0.045 | 3                        | 0.2  | 0.619 |
| Competitive environment                                    | 14                    | 9.5  | <.001 | 14                 | 2.1  | 0.217 | 14                       | 2.2  | 0.259 |
| Plot                                                       | 47                    | 7.2  | 0.013 | 47                 | 5.2  | 0.723 | 47                       | 5.9  | 0.005 |
| Fertilizer                                                 | 1                     | 0.6  | 0.007 | 1                  | 0.0  | 0.730 | 1                        | 0.3  | 0.021 |
| Comp.env.×Fertilizer                                       | 14                    | 0.3  | 0.994 | 14                 | 1.2  | 0.823 | 14                       | 1.4  | 0.085 |
| Subplot                                                    | 44                    | 3.4  | 0.015 | 44                 | 5.8  | <.001 | 44                       | 2.5  | 0.144 |
| Phytometer contrasts:                                      |                       |      |       |                    |      |       |                          |      |       |
| Swiss vs. other wheat                                      | 1                     | 0.7  | <.001 | 1                  | 0.0  | 0.336 | 1                        | 1.6  | <.001 |
| 3 conventional Swiss varieties                             | 2                     | 1.4  | <.001 | 2                  | 2.1  | <.001 | 2                        | 1.5  | <.001 |
| Bobwhite vs. Frisal                                        | 1                     | 0.7  | <.001 | 1                  | 0.0  | 0.617 | 1                        | 0.0  | 0.685 |
| Bobwhite vs. Sb lines                                      | 1                     | 1.2  | <.001 | 1                  | 0.2  | 0.066 | 1                        | 1.3  | <.001 |
| <i>Pm3b</i> lines vs. Sb lines                             | 1                     | 3.3  | <.001 | 1                  | 0.4  | 0.005 | 1                        | 0.3  | 0.012 |
| 4 Sb lines                                                 | 3                     | 0.5  | 0.026 | 3                  | 2.9  | <.001 | 3                        | 3.0  | <.001 |
| 4 <i>Pm3b</i> lines                                        | 3                     | 5.4  | <.001 | 3                  | 1.4  | <.001 | 3                        | 0.2  | 0.295 |
| A9 <i>Chi</i> and A13 <i>Chi/Glu</i> vs. Frisal            | 1                     | 0.0  | 0.325 | 1                  | 0.6  | <.001 | 1                        | 2.0  | <.001 |
| A9 <i>Chi</i> vs. A13 <i>Chi/Glu</i>                       | 1                     | 0.2  | 0.026 | 1                  | 0.0  | 0.832 | 1                        | 0.3  | 0.013 |
| Pairwise comparisons:                                      |                       |      |       |                    |      |       |                          |      |       |
| <i>Pm3b</i> #1 vs. Sb#1                                    | 1                     | 0.4  | 0.006 | 1                  | 0.1  | 0.210 | 1                        | 0.9  | <.001 |
| <i>Pm3b</i> #2 vs. Sb#2                                    | 1                     | 5.0  | <.001 | 1                  | 0.4  | 0.003 | 1                        | 0.8  | <.001 |
| <i>Pm3b</i> #3 vs. Sb#3                                    | 1                     | 0.0  | 0.523 | 1                  | 0.6  | <.001 | 1                        | 0.3  | 0.009 |
| <i>Pm3b</i> #4 vs. Sb#4                                    | 1                     | 0.6  | 0.001 | 1                  | 0.2  | 0.025 | 1                        | 0.4  | 0.004 |
| A9 <i>Chi</i> vs. Frisal                                   | 1                     | 0.3  | 0.025 | 1                  | 0.3  | 0.017 | 1                        | 2.4  | <.001 |
| A13 <i>Chi/Glu</i> vs. Frisal                              | 1                     | 0.0  | 0.862 | 1                  | 0.2  | 0.029 | 1                        | 1.1  | <.001 |
| Comp.env.×Phytometer lines                                 | 180                   | 5.2  | 0.999 | 180                | 5.5  | 0.999 | 180                      | 4.9  | 0.999 |
| Plot×Phytometer lines                                      | 515                   | 35.9 | <.001 | 610                | 33.3 | 0.025 | 610                      | 32.4 | 0.040 |
| Fertilizer×Swiss vs. other wheat                           | 1                     | 0.1  | 0.226 | 1                  | 0.0  | 0.781 | 1                        | 0.2  | 0.030 |
| Fertilizer×3 conventional Swiss varieties                  | 2                     | 0.0  | 0.907 | 2                  | 0.6  | 0.001 | 2                        | 0.1  | 0.373 |
| Fertilizer×Bobwhite vs. Frisal                             | 1                     | 0.0  | 0.716 | 1                  | 0.3  | 0.013 | 1                        | 0.1  | 0.235 |
| Fertilizer×Bobwhite vs. Sb lines                           | 1                     | 0.8  | <.001 | 1                  | 0.0  | 0.544 | 1                        | 0.6  | <.001 |
| Fertilizer× <i>Pm3b</i> lines vs. Sb lines                 | 1                     | 1.2  | <.001 | 1                  | 0.6  | <.001 | 1                        | 1.0  | <.001 |
| Fertilizer×4 Sb lines                                      | 3                     | 1.0  | <.001 | 3                  | 0.1  | 0.631 | 3                        | 0.4  | 0.025 |
| Fertilizer×4 <i>Pm3b</i> lines                             | 3                     | 0.1  | 0.611 | 3                  | 0.8  | 0.001 | 3                        | 0.7  | 0.002 |
| Fertilizer×A9 <i>Chi</i> and A13 <i>Chi/Glu</i> vs. Frisal | 1                     | 0.1  | 0.199 | 1                  | 0.0  | 0.468 | 1                        | 0.0  | 0.320 |
| Fertilizer×A9 <i>Chi</i> vs. A13 <i>Chi/Glu</i>            | 1                     | 0.0  | 0.324 | 1                  | 1.1  | <.001 | 1                        | 2.4  | <.001 |
| Residual                                                   | 403                   | 20.1 |       | 735                | 34.5 |       | 731                      | 33.9 |       |
| Total                                                      | 1250                  | 100  |       | 1677               | 100  |       | 1673                     | 100  |       |
